# Supplementary figures and images for: Dietary Lactobacillus casei K17 Improves Lipid Metabolism, Antioxidant Response, and Fillet Quality of Micropterus salmoides
Source: MDPI journal article supplement (doi:10.3390/ani11092564), 2021-08-31

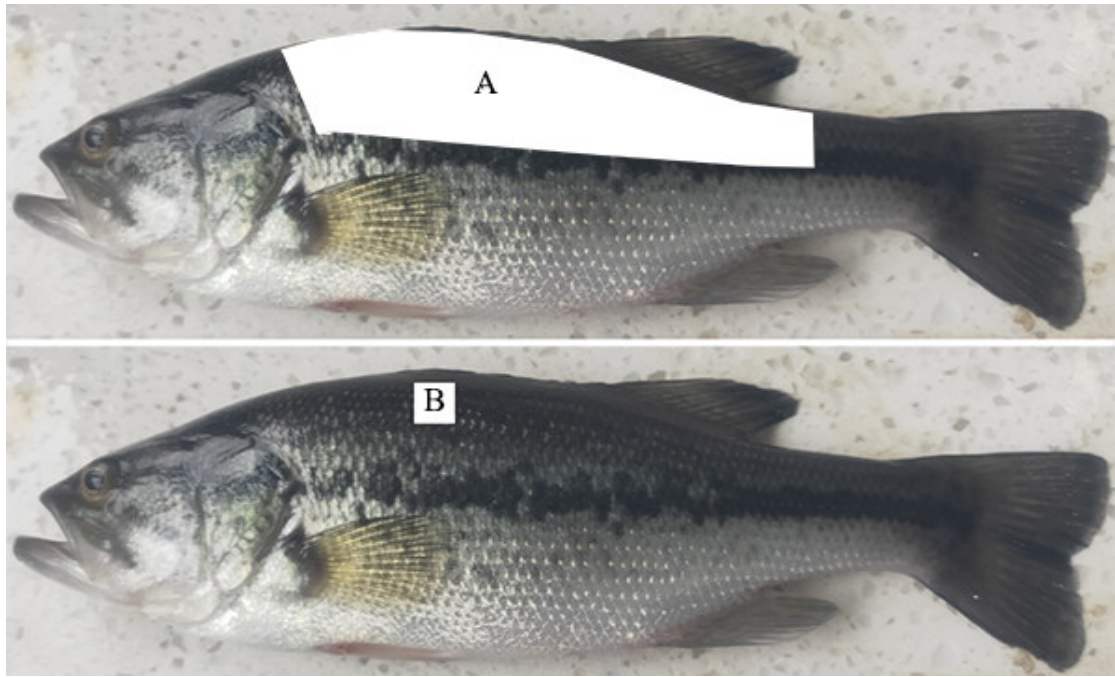

**Figure S1.** Sampling sites of fish for fillet quality. (A) Fillet composition. (B) Fillet texture.

Supplement: s1 [file s1]
